# Supplementary material for: CircMRPS35 suppresses gastric cancer progression via recruiting KAT7 to govern histone modification
Source: PubMed Central journal article supplement (PMC7066857; doi:10.1186/s12943-020-01160-2), 2020-03-12

# 动物伦理证明 (AMUWEC2019385)

## Animal Ethical Statement

兹有第三军医大学胡长江开展的国家自然科学基金 Hsa\_circ\_0000384 介导染色质重塑激活 FOXO1/FOXO3a 转录在抗胃癌中的作用及机制研究课题研究所使用的动物（裸鼠，性别：雄性，n=150），符合我国微生物的控制要求。实验设计、实验过程及动物处死方法，经过第三军医大学实验动物福利伦理审查委员会（Laboratory Animal Welfare and Ethics Committee Of the Third Military Medical University）审核，符合动物伦理和动物福利要求。

我单位实验动物生产许可证号为 SCXK（渝）20170002，使用许可证号为 SYXK（渝）20170002，同意该同志在整个实验的动物操作方法。

中国人民解放军第三军医大学  
实验动物福利伦理审查委员会

Laboratory Animal Welfare and Ethics Committee  
Of the Third Military Medical University

2019年3月11日

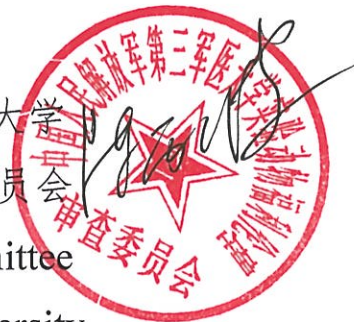

Supplement: 12943_2020_1160_MOESM11_ESM.pdf [file 12943_2020_1160_MOESM11_ESM.pdf]
